# Supplementary material for: Non-Small Cell Lung Cancer Cells Expressing CD44 Are Enriched for Stem Cell-Like Properties
Source: PLoS One. 2010 Nov 19;5(11):e14062. doi: 10.1371/journal.pone.0014062 (PMC2988826; doi:10.1371/journal.pone.0014062)
Supplement: Table S2 — Immunohistochemical CD44 Expression and Clinicopathological Profile of NSCLC. (0.03 MB XLS) [file pone.0014062.s004.xls]

## Sheet: Sheet1
Table S2. Immunohistochemical CD44 Expression and Clinicopathological Profile of NSCLC
Variables	n (%)		CD44 expression (all cases, n = 141)				P
			none or weak: n (%)		moderate to strong: n (%)
Median age [IQR], yr	64	[54.0 - 71.5]	63.5	[52.8 -74.3]	64	[53.1-74.9]	0.919*
Median tumor size [IQR], cm	3.3	[2.5- 4.5]	3.4	[1.8 -5.0]	3.2	[1.42-5.0]	0.831*
Sex, no. (%)
Male	46	(32.6)	49	(68.1)	46	(66.6)	1.000†
Female	95	(67.4)	23	(31.9)	23	(33.4)
Histology, no. (%)
AD	96	(68.0)	55	(76.4)	41	(59.4)	0.002** ‡
SCC	27	(19.2)	6	(8.3)	21	(30.4)
others	18	(12.8)	11	(15.3)	7	(10.2)
Smoking history, no. (%)
Non-smokers	60	(42.6)	28	(38.9)	32	(46.4)	0.398‡
Ever-smokers	81	(57.4)	44	(61.1)	37	(53.6)
Lymph node metastasis, no. (%)
Negative	96	(68.1)	49	(68.1)	47	(68.1)	1.000‡
Positive	45	(31.9)	23	(31.9)	22	(31.9)
N stage, no. (%)
N0	96	(68.1)	49	(68.1)	47	(68.1)	0.791‡
N1	24	(17.0)	11	(15.3)	13	(18.8)
N2	21	(14.9)	12	(16.6)	9	(13.1)
Grade, no. (%)
High	72	(51.1)	52	(72.2)	46	(66.7)	0.583‡
Low	69	(48.9)	20	(27.8)	23	(33.3)
Stage , no. (%)
I	84	(59.6)	41	(56.9)	43	(62.4)	0.843‡
II	29	(20.6)	16	(22.2)	13	(18.8)
9	28	(19.8)	15	(20.9)	13	(18.8)
Variables	n%		CD44 expression (AD cases, n = 96)				P
			none or weak expression: n (%)		moderate to strong: n (%)
Lymph node metastasis, no. (%)
Negative	67	(69.8)	39	(70.9)	28	(68.3)	0.825‡
Positive	29	(30.2)	16	(29.1)	13	(31.7)
Smoking history, no. (%)
Non-smokers	50	(52.1)	23	(41.8)	27	(65.9)	0.024‡
Ever-smokers	46	(47.9)	32	(58.2)	14	(34.1)
Stage , no. (%)
I	61	(63.5)	34	(61.8)	27	(65.8)	0.846‡
II	16	(16.7)	9	(16.4)	7	(17.1)
III	19	(19.8)	12	(21.8)	7	(17.1)
NOTE: Tumor size was not available for one case
Abbreviations: IQR, inter-quartile range; AD, adenocarcinoma; other tumors included
* Mann-Whitney U test; ** Comparison of AD versus SCC
† Chi-square test
‡ Fisher’s exact test
